# Supplementary material for: Pb2[C2O6]-P3m1: new insights into the high-pressure behavior of carbonates
Source: Royal Society of Chemistry journal article supplement (doi:10.1039/d4cp00395k), 2024-01-01
Supplement: d4cp00395k1.pdf [file d4cp00395k1.pdf]

## Supporting information

$\text{Pb}_2[\text{C}_2\text{O}_6]-P\bar{3}m1$ : New insight into high pressure behavior of  
carbonates

Maksim V. Banaev <sup>\*1,2</sup>, Dinara N. Sagatova <sup>†1</sup>, Nursultan E. Sagatov<sup>1,2</sup>, and Pavel N.  
Gavryushkin<sup>1,2</sup>

<sup>1</sup>*Sobolev Institute of Geology and Mineralogy, Siberian Branch of the Russian Academy  
of Sciences, Novosibirsk, Russian Federation*

<sup>2</sup>*Novosibirsk State University, Novosibirsk, Russian Federation*

---

\*Electronic address:banaev@igm.nsc.ru; Corresponding author

†Electronic address:d.sagatova1729@gmail.com; Corresponding author

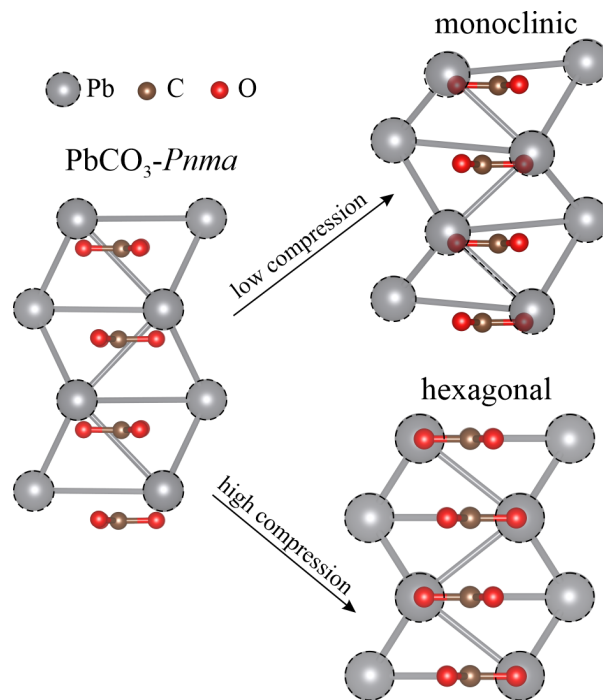

Figure S1: The results of two different compression schemes of  $\text{PbCO}_3$ -*Pnma* to 40 GPa. The low compression is a gradual compression to 40 GPa in steps of 5 GPa, and the high compression is a sharp compression to 40 GPa.

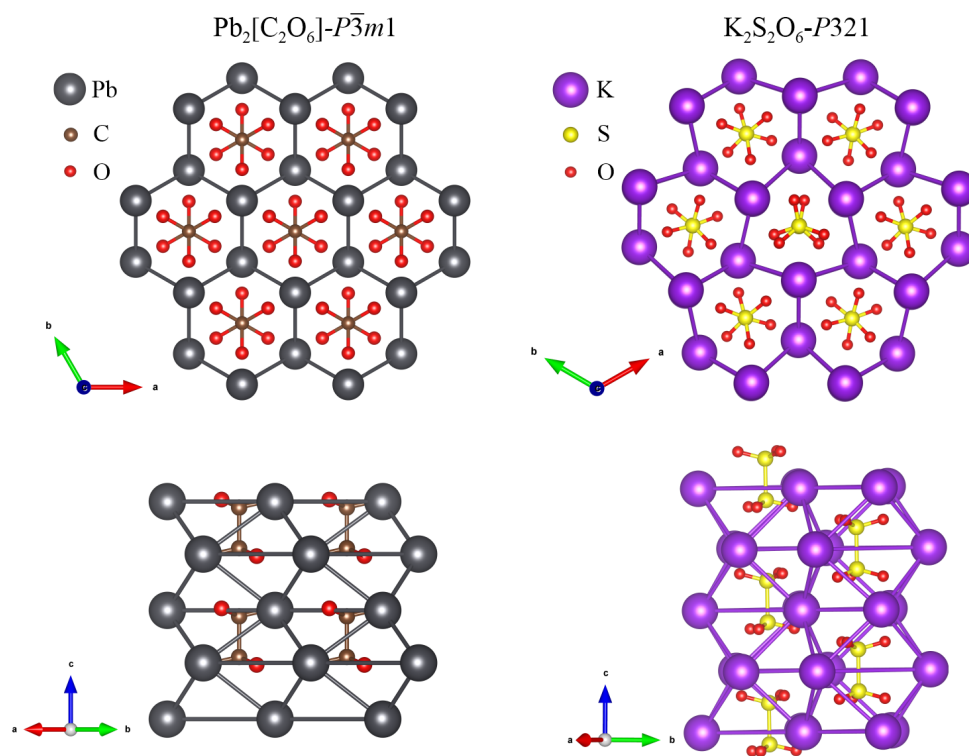

Figure S2: Comparison of the crystal structures of  $\text{Pb}_2[\text{C}_2\text{O}_6]-P\bar{3}m1$  and  $\text{K}_2\text{S}_2\text{O}_6-P321$ .

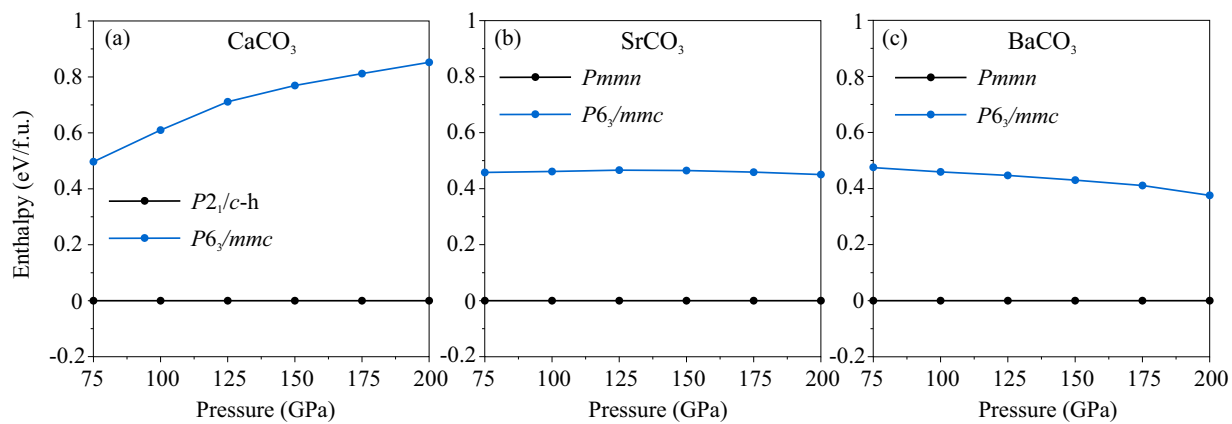

Figure S3: Relative enthalpy–pressure dependencies of  $\text{CaCO}_3$  (a),  $\text{SrCO}_3$  (b), and  $\text{BaCO}_3$  (c).

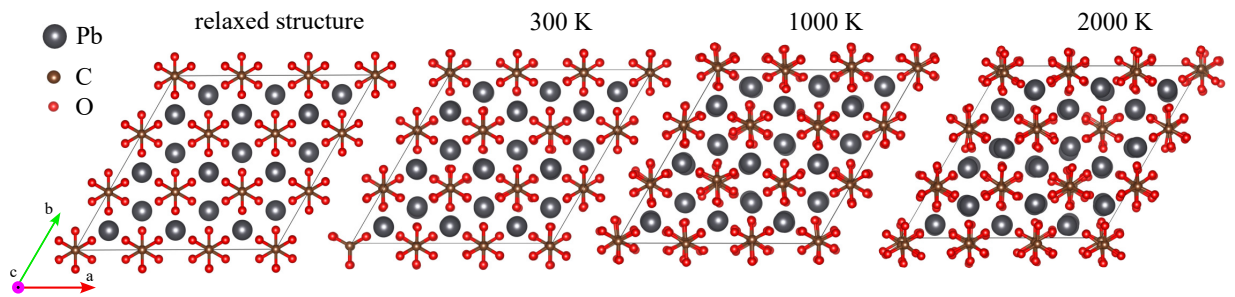

Figure S4: Optimized structure of  $\text{Pb}_2[\text{C}_2\text{O}_6]-P\bar{3}m1$  and snapshots of the last step of MD calculations at 100 GPa and 300, 1000 and 2000 K.

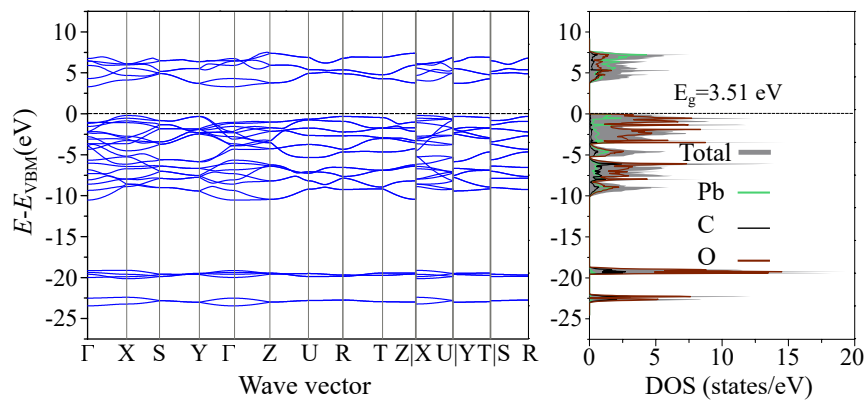

Figure S5: Band structure of  $\text{PbCO}_3-Pmmn$  at 30 GPa.

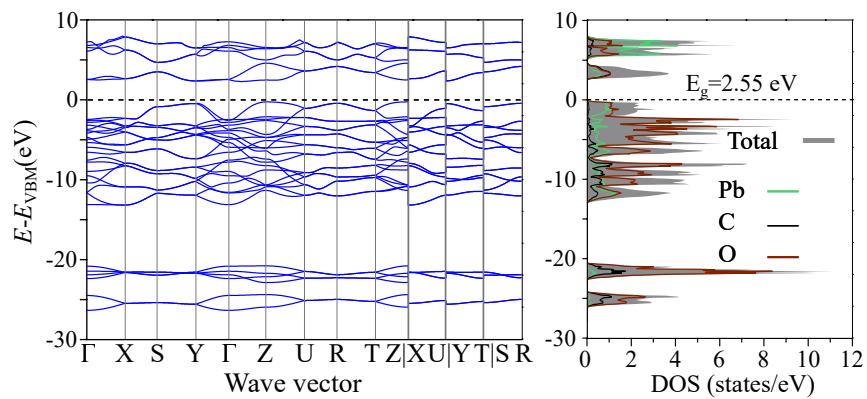

Figure S6: Band structure of  $\text{PbCO}_3-Pmmn$  at 100 GPa.
